# Supplementary material
Source: HighWire-hosted journal article supplement (doi:10.1101/rna.079605.123)
Supplement: Supplemental_Legends.docx [file Supplemental_Legends.docx]

**Supplemental Figure 1: Ro inhibits steroidogenesis in unstimulated cells.**

A) Dose-dependent effects of Ro on percent cortisol levels and cell viability relative to DMSO in 10 µM Forskolin stimulated H295R cells. Error bars indicate SD of 1 independent round of experiments containing 6 independent replicates. B) Summary of differentially expressed genes at each timepoint post 5 µM Ro treatment and the statistical test used to calculate differential expression LRT, p.adj < 0.05). Heatmap of the significance GO sets C) upregulated or D) downregulated in response to Ro. Yellow indicates enrichment, navy indicates depletion only gene sets with adjusted p-value < 0.05 for at least one time point were depicted.

**Supplemental Figure 2: R100A MSI2 is unable to rescue Ro phenotypes.**

A) Diagram of the the pRD-RIPE plasmid containing floxed MSI2 and it recombining into the AAVS safe harbor locust within H295R cells. B) Percent viability of Ro treated H295R-R100A cells, with or without doxycycline. Error bars indicate SD of 2 independent rounds of experiments, each containing 6 independent replicates. The experiment was paired with the aldosterone data found in Figure 2A. C) Western blot of FLAG-MSI2-R100A and endogenous MSI2 in Ro-treated cells with or without doxycycline. α-Tubulin included as a loading control. D) The top 10 most enriched motifs in 3’ UTRs of mRNAs enriched in the MSI2 RIP-seq experiment. MSI2 binding motif highlighted in red. E) RIP-qPCR enrichment of MSI2 targets (CCSAP, SCD) and non-targets (ACTB, GAPDH) normalized by YARs using H295R cells containing FLAG-MSI2-WT induced (red, FLAG antibody) or not induced (gray, endogenous MSI2 antibody). Error bars indicate SE from 3-6 replicates. F) Schematic of NanoLuc luciferase reporter construct containing MSI2 binding sites used in the dual luciferase assay. G) Western blot of FLAG-MSI2-R100A and endogenous MSI2 in HEK293 cells, with or without doxycycline. α-Tubulin included as a loading control. H) Ro dose-dependent effects on the percent viability measured by Cell-Titer Glo assay relative to DMSO in K562 cells transfected with FLAG-MSI2-R100A plasmid or FLAG-MSI2-WT plasmid and treated with or without doxycycline. Error bars indicate SD of 2 experiments containing 6 independent replicates. I) Western blot of FLAG-MSI2-R100A, FLAG-MSI2-WT, and endogenous MSI2 in Ro-treated K562 cells, with or without doxycycline. α-Tubulin included as a loading control.

**Supplemental Figure 3: Ro treatment causes stress granule formation.**

A) Enrichment of significant KEGG pathways overlapping with proteins identified as Ro interactors from PISA assay.

***List of Supplemental Information (Found in Supplemental Folder)***

**Supplemental Table 1: Ro-Dependent expression changes (whole time course)**

**Supplemental Table 2: Ro-Dependent expression changes (pairwise comparisons)**

**Supplemental Table 3: All DE pathways**

**Supplemental Table 4: MSI2 RIP-Seq targets**

**Supplemental Table 5: All significant GO terms for Ro interactors from PISA**

**Supplemental Table 6: Antibody information.**

**Supplemental Table 7: MSI2 cloning information and qPCR primers.**
